# Supplementary material for: Can the relative positions (cis–trans) of ligands really modulate the coordination of NO in ruthenium nitrosyl complexes?
Source: Royal Society of Chemistry journal article supplement (doi:10.1039/d0nj05262k), 2020-12-21
Supplement: d0nj05262k1.pdf [file d0nj05262k1.pdf]

ARTICLE

## Are the Relative Positions (*cis–trans*) of Ligands Really Able to Modulate the Coordination of NO in Ruthenium Nitrosyl Complexes?

Renato Pereira Orenha,<sup>\*a</sup> Grazielle Cappato Guerra Silva,<sup>a</sup> Nelson Henrique Morgon,<sup>b</sup> Giovanni Finoto Caramori<sup>c</sup> and Renato Luis Tame Parreira<sup>\*a</sup>

### Supplementary Material

<sup>a</sup> Núcleo de Pesquisas em Ciências Exatas e Tecnológicas, Universidade de Franca, Franca, SP, Brazil. E-mail: rpo9@hotmail.com / renato.parreira@unifran.edu.br

<sup>b</sup> Instituto de Química, Universidade Estadual de Campinas, CP 6154, 13083–970, Campinas, SP, Brazil.

<sup>c</sup> Departamento de Química, Universidade Federal de Santa Catarina, Campus Universitário Trindade, CP 476, Florianópolis, SC, 88040–900, Brazil.

**Table S1.** Optimized Cartesian coordinates of the compounds investigated in this paper from the ZORA–BP86/TZ2P computational model.

| Complex | 1         |           |           |
|---------|-----------|-----------|-----------|
| Atom    | X         | Y         | Z         |
| Ru      | -0.085026 | 0.002717  | 0.002464  |
| N       | -2.267673 | 0.064570  | -0.013198 |
| N       | -0.135188 | 1.540893  | 1.554798  |
| N       | -0.236956 | -1.544638 | -1.532433 |
| N       | -0.185492 | -1.533109 | 1.554905  |
| N       | -0.101024 | 1.559741  | -1.529820 |
| H       | -2.675688 | 0.894934  | 0.440770  |
| H       | -2.674358 | 0.063481  | -0.960229 |
| H       | -2.722861 | -0.732099 | 0.455870  |
| H       | -0.550732 | 2.434737  | 1.257399  |
| H       | -0.658476 | 1.269691  | 2.398953  |
| H       | 0.800885  | 1.793851  | 1.901882  |
| H       | -1.021785 | -2.196660 | -1.395552 |
| H       | 0.597634  | -2.146362 | -1.580251 |
| H       | -0.353464 | -1.188139 | -2.491311 |
| H       | 0.581019  | -1.449361 | 2.237863  |
| H       | -1.041847 | -1.522671 | 2.125845  |
| H       | -0.111858 | -2.497546 | 1.201721  |
| H       | 0.419323  | 2.402719  | -1.247790 |
| H       | -1.032942 | 1.902609  | -1.800374 |
| H       | 0.343496  | 1.271309  | -2.412989 |
| N       | 1.690556  | -0.049421 | -0.018076 |
| O       | 2.826494  | -0.082934 | -0.043370 |
| Complex | 2         |           |           |
| Atom    | X         | Y         | Z         |
| Ru      | -0.114258 | -0.002586 | -0.016504 |
| N       | -2.206383 | 0.056649  | 0.958824  |
| N       | 0.870977  | 0.224873  | 1.896480  |
| N       | -1.037161 | -0.237865 | -1.989405 |
| N       | -0.087731 | -2.169284 | 0.256690  |
| N       | -0.188927 | 2.170985  | -0.215447 |
| H       | -2.205158 | 0.233974  | 1.969103  |
| H       | -2.821678 | 0.777919  | 0.565717  |
| H       | -2.737073 | -0.814512 | 0.846606  |
| H       | 0.665915  | 1.095446  | 2.400152  |
| H       | 0.692917  | -0.522324 | 2.577346  |
| H       | 1.891655  | 0.226207  | 1.756102  |
| H       | -1.633921 | -1.063935 | -2.110046 |
| H       | -0.290779 | -0.331999 | -2.689441 |
| H       | -1.614829 | 0.547662  | -2.309342 |
| H       | 0.849469  | -2.500103 | 0.514601  |
| H       | -0.713925 | -2.531623 | 0.984154  |

| Journal Name |   |           |           | ARTICLE   |
|--------------|---|-----------|-----------|-----------|
| H            |   | -0.320757 | -2.696788 | -0.592310 |
| H            |   | 0.703109  | 2.605185  | 0.049090  |
| H            |   | -0.901237 | 2.644208  | 0.351236  |
| H            |   | -0.350097 | 2.486483  | -1.178688 |
| N            |   | 1.568165  | -0.046858 | -0.766201 |
| O            |   | 2.705425  | -0.007157 | -0.438285 |
| Complex      |   | <b>3</b>  |           |           |
| Atom         | X | Y         | Z         |           |
| Ru           |   | -0.074151 | 0.002286  | -0.253893 |
| N            |   | -1.028545 | 1.931339  | -0.019937 |
| N            |   | 1.001146  | -1.844398 | -0.614307 |
| N            |   | -2.139868 | -1.074698 | -0.475344 |
| H            |   | -1.220992 | 2.427514  | -0.897041 |
| H            |   | -1.923135 | 1.897713  | 0.482645  |
| H            |   | -0.423109 | 2.561919  | 0.518645  |
| H            |   | 0.746829  | -2.345857 | -1.472528 |
| H            |   | 0.875102  | -2.526330 | 0.142489  |
| H            |   | 2.012117  | -1.673621 | -0.668161 |
| H            |   | -2.632353 | -1.063277 | 0.425312  |
| H            |   | -2.807076 | -0.671756 | -1.142593 |
| H            |   | -2.083822 | -2.068346 | -0.725362 |
| N            |   | 0.203136  | -0.124331 | 1.471770  |
| O            |   | 0.479221  | -0.159391 | 2.585259  |
| N            |   | -0.039916 | 0.361052  | -2.407162 |
| H            |   | 0.387716  | 1.271608  | -2.612827 |
| H            |   | 0.539064  | -0.310755 | -2.924253 |
| H            |   | -0.951107 | 0.356854  | -2.880581 |
| H            |   | 1.313392  | 0.765258  | -0.341099 |
| Complex      |   | <b>4</b>  |           |           |
| Atom         | X | Y         | Z         |           |
| Ru           |   | -0.162574 | -0.379021 | -0.093936 |
| N            |   | -2.289383 | -0.407403 | 0.769541  |
| H            |   | 0.290894  | -0.246790 | 1.439020  |
| N            |   | -1.072971 | -0.535657 | -2.251278 |
| N            |   | 0.007712  | -2.551708 | 0.149806  |
| N            |   | -0.110617 | 1.769137  | -0.159359 |
| H            |   | -1.428237 | -1.458583 | -2.515685 |
| H            |   | -0.313396 | -0.337348 | -2.908404 |
| H            |   | -1.821626 | 0.122900  | -2.483246 |
| H            |   | 0.983288  | -2.770817 | -0.078565 |
| H            |   | -0.126715 | -2.845415 | 1.120618  |
| H            |   | -0.571526 | -3.167866 | -0.427959 |
| H            |   | 0.857115  | 2.013306  | -0.415688 |
| H            |   | -0.271077 | 2.189317  | 0.760056  |
| H            |   | -0.718582 | 2.261877  | -0.820699 |

| ARTICLE |           |  | Journal Name |           |
|---------|-----------|--|--------------|-----------|
| N       | 1.573093  |  | -0.294768    | -0.626838 |
| O       | 2.421413  |  | 0.519742     | -0.880149 |
| H       | -2.854461 |  | 0.420938     | 0.565408  |
| H       | -2.183847 |  | -0.430910    | 1.787138  |
| H       | -2.874166 |  | -1.211622    | 0.523030  |
| Complex |           |  | 5            |           |
| Atom    | X         |  | Y            | Z         |
| Ru      | -0.028368 |  | -0.028937    | -0.038685 |
| N       | -0.223868 |  | -1.499326    | -1.580012 |
| N       | -0.281669 |  | -1.564249    | 1.494055  |
| N       | 0.005881  |  | 1.566886     | -1.529166 |
| H       | 0.163328  |  | -2.417562    | -1.317020 |
| H       | 0.272424  |  | -1.247243    | -2.447415 |
| H       | -1.196110 |  | -1.684409    | -1.865441 |
| H       | -0.925721 |  | -1.284411    | 2.248079  |
| H       | -0.649350 |  | -2.463999    | 1.152934  |
| H       | 0.596541  |  | -1.808080    | 1.974759  |
| H       | 0.943631  |  | 1.968955     | -1.673179 |
| H       | -0.589498 |  | 2.369917     | -1.279509 |
| H       | -0.305391 |  | 1.289931     | -2.471233 |
| N       | 1.747551  |  | -0.194399    | -0.040722 |
| O       | 2.878417  |  | -0.288372    | -0.029630 |
| N       | -2.182646 |  | 0.214610     | 0.009297  |
| H       | -2.615931 |  | 0.546445     | -0.865024 |
| H       | -2.723127 |  | -0.625274    | 0.263796  |
| H       | -2.433274 |  | 0.921231     | 0.718923  |
| O       | -0.082134 |  | 1.478099     | 1.517700  |
| H       | 0.250619  |  | 2.390830     | 1.373185  |
| H       | 0.148550  |  | 1.274367     | 2.450421  |
| Complex |           |  | 6            |           |
| Atom    | X         |  | Y            | Z         |
| Ru      | -0.053675 |  | 0.011697     | 0.004069  |
| N       | -0.076155 |  | 1.504248     | 1.588061  |
| N       | -0.030469 |  | -1.496590    | -1.547263 |
| N       | 0.052798  |  | 1.518071     | -1.516060 |
| H       | -0.464446 |  | 2.424732     | 1.352406  |
| H       | -0.599361 |  | 1.194673     | 2.415388  |
| H       | 0.880022  |  | 1.686971     | 1.916223  |
| H       | -0.459584 |  | -2.391765    | -1.286131 |
| H       | 0.938902  |  | -1.729872    | -1.804434 |
| H       | -0.488309 |  | -1.230966    | -2.426762 |
| H       | 0.405705  |  | 2.417295     | -1.168133 |
| H       | -0.840494 |  | 1.729568     | -1.975268 |
| H       | 0.701362  |  | 1.259771     | -2.269995 |
| N       | 1.778439  |  | -0.138509    | 0.034648  |

| Journal Name |           |           |   | ARTICLE   |
|--------------|-----------|-----------|---|-----------|
| O            | 2.690473  | -0.410252 |   | -0.664199 |
| N            | -2.341391 | 0.017641  |   | 0.035105  |
| H            | -2.773718 | 0.941419  |   | 0.147857  |
| H            | -2.811621 | -0.395099 |   | -0.777501 |
| H            | -2.667028 | -0.527798 |   | 0.842022  |
| O            | -0.310622 | -1.510817 |   | 1.627932  |
| H            | 0.380630  | -1.501460 |   | 2.320529  |
| H            | -0.447061 | -2.459819 |   | 1.435287  |
| Complex      | <b>7</b>  |           |   |           |
| Atom         | X         | Y         | Z |           |
| Ru           | -0.133096 | 0.050088  |   | 0.023800  |
| N            | -0.221589 | -1.955990 |   | 1.148307  |
| N            | -0.435731 | -0.902085 |   | -1.893052 |
| N            | -0.057964 | 1.184575  |   | 1.862518  |
| H            | -1.156627 | -2.276754 |   | 1.420854  |
| H            | 0.181540  | -2.727888 |   | 0.605512  |
| H            | 0.323589  | -1.942248 |   | 2.017545  |
| H            | -0.802956 | -1.859910 |   | -1.868356 |
| H            | -1.092164 | -0.353695 |   | -2.462340 |
| H            | 0.428160  | -0.951546 |   | -2.445309 |
| H            | -0.342510 | 0.685678  |   | 2.712839  |
| H            | -0.663696 | 2.011737  |   | 1.794459  |
| H            | 0.881138  | 1.550163  |   | 2.057948  |
| N            | 1.610307  | -0.052033 |   | -0.094684 |
| O            | 2.760065  | -0.113558 |   | -0.175782 |
| N            | -2.345390 | 0.077575  |   | 0.231765  |
| H            | -2.577165 | 0.965178  |   | -0.237989 |
| H            | -2.876459 | -0.663096 |   | -0.240423 |
| H            | -2.732837 | 0.126708  |   | 1.181010  |
| N            | -0.503407 | 1.775295  |   | -0.897348 |
| H            | -0.088471 | 2.611388  |   | -0.472235 |
| H            | -0.230783 | 1.826906  |   | -1.884739 |
| Complex      | <b>8</b>  |           |   |           |
| Atom         | X         | Y         | Z |           |
| Ru           | -0.059893 | 0.029092  |   | 0.028358  |
| N            | -0.034857 | 1.468892  |   | 1.666073  |
| N            | -0.007325 | -1.533659 |   | -1.435107 |
| N            | -0.196458 | 1.660964  |   | -1.552760 |
| H            | -0.468116 | 2.383664  |   | 1.511162  |
| H            | -0.485902 | 1.073723  |   | 2.497972  |
| H            | 0.942345  | 1.647266  |   | 1.920631  |
| H            | -0.437937 | -2.396458 |   | -1.085041 |
| H            | 0.986200  | -1.752058 |   | -1.600654 |
| H            | -0.427005 | -1.353576 |   | -2.352019 |
| H            | 0.159629  | 2.560719  |   | -1.218729 |

| ARTICLE |   |           |           | Journal Name |
|---------|---|-----------|-----------|--------------|
| H       |   | -1.147256 | 1.836460  | -1.887985    |
| H       |   | 0.366043  | 1.443471  | -2.380204    |
| N       |   | 1.751018  | -0.003667 | -0.072173    |
| O       |   | 2.621334  | -0.665824 | -0.582807    |
| N       |   | -2.404871 | -0.010450 | 0.069080     |
| H       |   | -2.967090 | 0.789355  | 0.372726     |
| H       |   | -2.915838 | -0.443659 | -0.704024    |
| H       |   | -2.366383 | -0.696673 | 0.841161     |
| N       |   | -0.419776 | -1.392204 | 1.421835     |
| H       |   | 0.038001  | -1.235586 | 2.326241     |
| H       |   | -0.116792 | -2.339544 | 1.167817     |
| Complex |   |           | <b>9</b>  |              |
| Atom    | X |           | Y         | Z            |
| Ru      |   | -0.050177 | 0.004374  | 0.001887     |
| N       |   | -0.083639 | 1.533980  | 1.573156     |
| N       |   | -0.239791 | -1.507577 | -1.574717    |
| N       |   | -0.320945 | -1.562761 | 1.530808     |
| H       |   | -0.719779 | 2.316690  | 1.363533     |
| H       |   | -0.361524 | 1.191933  | 2.503802     |
| H       |   | 0.834055  | 1.981439  | 1.713631     |
| H       |   | -0.546764 | -2.435121 | -1.249594    |
| H       |   | 0.646079  | -1.676386 | -2.073527    |
| H       |   | -0.903084 | -1.239329 | -2.315849    |
| H       |   | 0.140713  | -1.343309 | 2.425803     |
| H       |   | -1.298019 | -1.770010 | 1.781967     |
| H       |   | 0.080126  | -2.472266 | 1.258401     |
| N       |   | 1.748628  | -0.148307 | 0.060521     |
| O       |   | 2.874319  | -0.223485 | 0.078119     |
| N       |   | -2.218188 | 0.200122  | -0.078651    |
| H       |   | -2.558635 | 0.907997  | -0.747290    |
| H       |   | -2.702394 | -0.668539 | -0.350851    |
| H       |   | -2.643305 | 0.467656  | 0.821793     |
| C       |   | 0.082336  | 1.432800  | -1.384798    |
| O       |   | 0.162102  | 2.241877  | -2.170461    |
| Complex |   |           | <b>10</b> |              |
| Atom    | X |           | Y         | Z            |
| Ru      |   | -0.144913 | 0.112637  | 0.103288     |
| N       |   | -0.370580 | 1.335161  | 1.898382     |
| N       |   | -0.013788 | -1.096022 | -1.710276    |
| N       |   | -0.381909 | -1.760756 | 1.342314     |
| H       |   | -1.219363 | 1.911607  | 1.907191     |
| H       |   | -0.373866 | 0.805320  | 2.777144     |
| H       |   | 0.405448  | 2.001801  | 1.986374     |
| H       |   | 0.045627  | -2.107111 | -1.545618    |
| H       |   | 0.828527  | -0.858469 | -2.247346    |

| Journal Name |           |           |           | ARTICLE   |
|--------------|-----------|-----------|-----------|-----------|
| H            | -0.793664 | -0.956279 | -2.362238 |           |
| H            | 0.542650  | -2.087696 | 1.649742  |           |
| H            | -0.932282 | -1.658150 | 2.202686  |           |
| H            | -0.805969 | -2.562004 | 0.860810  |           |
| N            | 1.716647  | -0.014415 | 0.373220  |           |
| O            | 2.737702  | 0.492010  | 0.131861  |           |
| C            | 0.035502  | 1.679472  | -0.934690 |           |
| O            | 0.160296  | 2.630327  | -1.563101 |           |
| N            | -2.417800 | 0.141267  | -0.139571 |           |
| H            | -2.748358 | 0.936483  | -0.697387 |           |
| H            | -2.797063 | -0.691894 | -0.603996 |           |
| H            | -2.929993 | 0.200718  | 0.748021  |           |
| Complex      |           |           |           | <b>11</b> |
| Atom         | X         | Y         | Z         |           |
| Ru           | 0.000212  | 0.011203  | -0.012948 |           |
| N            | -0.088581 | 1.556580  | 1.508969  |           |
| N            | -0.083852 | -1.683791 | -1.367692 |           |
| N            | -0.191244 | 1.504603  | -1.711296 |           |
| H            | -0.922696 | 2.153976  | 1.493472  |           |
| H            | -0.076424 | 1.098801  | 2.430873  |           |
| H            | 0.712407  | 2.198623  | 1.498435  |           |
| H            | -0.338369 | -2.522028 | -0.827573 |           |
| H            | 0.824204  | -1.899684 | -1.795266 |           |
| H            | -0.744764 | -1.614480 | -2.149663 |           |
| H            | -0.049861 | 2.480163  | -1.424656 |           |
| H            | -1.091285 | 1.498023  | -2.204356 |           |
| H            | 0.511502  | 1.341544  | -2.441982 |           |
| N            | 1.764019  | -0.016250 | 0.034778  |           |
| O            | 2.901175  | -0.078597 | 0.122694  |           |
| C            | -0.140450 | -1.302701 | 1.471211  |           |
| N            | -0.348909 | -2.059073 | 2.337901  |           |
| N            | -2.180495 | -0.081498 | 0.098864  |           |
| H            | -2.675133 | 0.818569  | 0.087490  |           |
| H            | -2.624624 | -0.646754 | -0.634872 |           |
| H            | -2.430079 | -0.546014 | 0.983951  |           |
| Complex      |           |           |           | <b>12</b> |
| Atom         | X         | Y         | Z         |           |
| Ru           | -0.068719 | -0.029554 | -0.007285 |           |
| N            | -0.321294 | -1.637874 | -1.642519 |           |
| N            | -0.224757 | -1.483917 | 1.613665  |           |
| N            | 0.014575  | 1.611733  | -1.430272 |           |
| H            | -0.856648 | -2.467758 | -1.372629 |           |
| H            | 0.618718  | -1.974782 | -1.873752 |           |
| H            | -0.730937 | -1.323263 | -2.526556 |           |
| H            | -0.035279 | -0.980000 | 2.487257  |           |

| ARTICLE |           |           | Journal Name                      |
|---------|-----------|-----------|-----------------------------------|
| H       | -1.128974 | -1.949019 | 1.730229                          |
| H       | 0.477886  | -2.224445 | 1.544664                          |
| H       | 0.173429  | 2.467854  | -0.886765                         |
| H       | -0.819703 | 1.770968  | -2.002009                         |
| H       | 0.799333  | 1.531087  | -2.082105                         |
| N       | 1.755366  | -0.227250 | -0.084785                         |
| O       | 2.785421  | 0.277353  | 0.210630                          |
| N       | -2.345305 | 0.287995  | 0.160472                          |
| H       | -2.604836 | 1.215272  | -0.187614                         |
| H       | -3.003840 | -0.373436 | -0.261972                         |
| H       | -2.562441 | 0.332602  | 1.161066                          |
| C       | 0.025964  | 1.347104  | 1.384773                          |
| N       | -0.022732 | 2.176465  | 2.213732                          |
| Complex |           |           | $[\text{Ru}(\text{NH}_3)_5]^{2+}$ |
| Atom    | X         | Y         | Z                                 |
| Ru      | -0.164119 | 0.005016  | 0.005174                          |
| N       | -2.244691 | 0.072732  | 0.002525                          |
| N       | -0.010906 | 1.526226  | 1.545795                          |
| N       | -0.112008 | -1.524556 | -1.535960                         |
| N       | -0.117297 | -1.539187 | 1.530338                          |
| N       | -0.004379 | 1.539915  | -1.522831                         |
| H       | -2.622171 | 1.018060  | 0.142099                          |
| H       | -2.663758 | -0.257327 | -0.875668                         |
| H       | -2.674730 | -0.500735 | 0.738680                          |
| H       | -0.444182 | 2.432063  | 1.328643                          |
| H       | -0.402548 | 1.271674  | 2.460448                          |
| H       | 0.971808  | 1.756036  | 1.743732                          |
| H       | -0.685381 | -2.358269 | -1.358744                         |
| H       | 0.840173  | -1.891820 | -1.662484                         |
| H       | -0.390822 | -1.217823 | -2.475724                         |
| H       | 0.849911  | -1.772842 | 1.790172                          |
| H       | -0.568797 | -1.303645 | 2.422660                          |
| H       | -0.533000 | -2.439848 | 1.263685                          |
| H       | -0.229142 | 2.494238  | -1.217078                         |
| H       | -0.581167 | 1.400493  | -2.361216                         |
| H       | 0.956949  | 1.608998  | -1.881559                         |
| Complex |           |           | $[\text{RuH}(\text{NH}_3)_4]^+$   |
| Atom    | X         | Y         | Z                                 |
| Ru      | -0.918946 | -0.284659 | -0.345668                         |
| N       | -1.721489 | -0.106516 | 1.640421                          |
| H       | 0.522433  | -0.112941 | 0.247453                          |
| N       | -0.077846 | -0.463297 | -2.327037                         |
| N       | -0.759800 | -2.414409 | -0.071492                         |
| N       | -1.046419 | 1.849729  | -0.614848                         |
| H       | -0.690857 | -0.902060 | -3.023414                         |



| Journal Name |                                                                      |           |           | ARTICLE |
|--------------|----------------------------------------------------------------------|-----------|-----------|---------|
| H            | 0.780337                                                             | -1.023190 | -2.316747 |         |
| H            | 0.204876                                                             | 0.429636  | -2.746052 |         |
| H            | 0.179612                                                             | -2.750672 | -0.305390 |         |
| H            | -0.905550                                                            | -2.723730 | 0.896857  |         |
| H            | -1.408987                                                            | -2.977897 | -0.632145 |         |
| H            | -0.202100                                                            | 2.223815  | -1.061593 |         |
| H            | -1.119116                                                            | 2.372295  | 0.264020  |         |
| H            | -1.834135                                                            | 2.172556  | -1.188481 |         |
| H            | -1.178932                                                            | 0.565094  | 2.193181  |         |
| H            | -1.689377                                                            | -0.973075 | 2.190459  |         |
| H            | -2.698028                                                            | 0.205212  | 1.692182  |         |
| Complex      | <b>[Ru(H<sub>2</sub>O)(NH<sub>3</sub>)<sub>5</sub>]<sup>2+</sup></b> |           |           |         |
| Atom         | X                                                                    | Y         | Z         |         |
| Ru           | -0.177933                                                            | 0.009846  | -0.011163 |         |
| N            | -0.010383                                                            | 1.502599  | 1.554704  |         |
| N            | -0.152220                                                            | -1.521126 | -1.548431 |         |
| N            | -0.008853                                                            | 1.521263  | -1.494802 |         |
| H            | -0.277967                                                            | 2.460210  | 1.295850  |         |
| H            | -0.557944                                                            | 1.307742  | 2.402038  |         |
| H            | 0.959208                                                             | 1.591441  | 1.886218  |         |
| H            | -0.762059                                                            | -2.329641 | -1.374479 |         |
| H            | 0.787886                                                             | -1.923937 | -1.657545 |         |
| H            | -0.406403                                                            | -1.212246 | -2.494737 |         |
| H            | -0.363865                                                            | 2.444806  | -1.218303 |         |
| H            | -0.488888                                                            | 1.319125  | -2.380353 |         |
| H            | 0.971079                                                             | 1.688933  | -1.761630 |         |
| N            | -2.244775                                                            | 0.021462  | 0.081238  |         |
| H            | -2.658508                                                            | 0.921452  | 0.352852  |         |
| H            | -2.716530                                                            | -0.243798 | -0.791720 |         |
| H            | -2.554739                                                            | -0.658725 | 0.789603  |         |
| O            | -0.312314                                                            | -1.554241 | 1.531397  |         |
| H            | 0.050846                                                             | -1.402793 | 2.425048  |         |
| H            | -0.080151                                                            | -2.480470 | 1.327546  |         |
| Complex      | <b>[Ru(NH<sub>2</sub>)(NH<sub>3</sub>)<sub>5</sub>]<sup>+</sup></b>  |           |           |         |
| Atom         | X                                                                    | Y         | Z         |         |
| Ru           | -0.212449                                                            | 0.055826  | 0.013451  |         |
| N            | -0.157283                                                            | 1.473105  | 1.634930  |         |
| N            | -0.128859                                                            | -1.522902 | -1.451105 |         |
| N            | -0.085164                                                            | 1.682245  | -1.561553 |         |
| H            | -0.728532                                                            | 2.320022  | 1.544202  |         |
| H            | -0.473263                                                            | 1.012872  | 2.497271  |         |
| H            | 0.790378                                                             | 1.807084  | 1.839425  |         |
| H            | -0.453971                                                            | -2.399240 | -1.024909 |         |
| H            | 0.825878                                                             | -1.717351 | -1.770577 |         |
| H            | -0.681105                                                            | -1.405485 | -2.307140 |         |

| ARTICLE |                                              |           |           | Journal Name |
|---------|----------------------------------------------|-----------|-----------|--------------|
| H       | 0.322306                                     | 2.555152  | -1.213156 |              |
| H       | -0.986360                                    | 1.952423  | -1.967143 |              |
| H       | 0.501545                                     | 1.425651  | -2.361192 |              |
| N       | -2.255085                                    | -0.074134 | 0.122114  |              |
| H       | -2.772315                                    | 0.736520  | 0.474873  |              |
| H       | -2.762407                                    | -0.409781 | -0.701989 |              |
| H       | -2.244874                                    | -0.828012 | 0.855897  |              |
| N       | -0.412673                                    | -1.402519 | 1.427842  |              |
| H       | -0.027413                                    | -1.198420 | 2.357045  |              |
| H       | -0.021636                                    | -2.323316 | 1.198248  |              |
| Complex | $[\text{Ru}(\text{CO})(\text{NH}_3)_4]^{2+}$ |           |           |              |
| Atom    | X                                            | Y         | Z         |              |
| Ru      | -0.336623                                    | 0.122219  | 0.068403  |              |
| N       | -0.394149                                    | 1.363787  | 1.847908  |              |
| N       | -0.053803                                    | -1.155682 | -1.66355  |              |
| N       | -0.276172                                    | -1.696751 | 1.378054  |              |
| H       | -0.820685                                    | 2.285719  | 1.7006    |              |
| H       | -0.871854                                    | 0.969987  | 2.666821  |              |
| H       | 0.561476                                     | 1.573150  | 2.167074  |              |
| H       | -0.430560                                    | -2.108331 | -1.59692  |              |
| H       | 0.949845                                     | -1.274893 | -1.85707  |              |
| H       | -0.436241                                    | -0.771666 | -2.53533  |              |
| H       | 0.694988                                     | -1.934506 | 1.623123  |              |
| H       | -0.753216                                    | -1.615228 | 2.283895  |              |
| H       | -0.652098                                    | -2.559568 | 0.966886  |              |
| C       | -0.198671                                    | 1.640633  | -1.01017  |              |
| O       | -0.088694                                    | 2.574588  | -1.67262  |              |
| N       | -2.405121                                    | 0.136561  | -0.14218  |              |
| H       | -2.832793                                    | 1.007845  | 0.194566  |              |
| H       | -2.706043                                    | 0.045332  | -1.12025  |              |
| H       | -2.861035                                    | -0.626743 | 0.372531  |              |
| Complex | $[\text{Ru}(\text{CN})(\text{NH}_3)_4]^+$    |           |           |              |
| Atom    | X                                            | Y         | Z         |              |
| Ru      | -0.228325                                    | -0.029038 | -0.002337 |              |
| N       | -0.379127                                    | -1.599913 | -1.674385 |              |
| N       | -0.255254                                    | -1.524014 | 1.560180  |              |
| N       | 0.019775                                     | 1.604851  | -1.396516 |              |
| H       | -0.867996                                    | -2.460063 | -1.409307 |              |
| H       | 0.547346                                     | -1.909315 | -1.986092 |              |
| H       | -0.848706                                    | -1.277940 | -2.525824 |              |
| H       | -0.285493                                    | -1.013168 | 2.450587  |              |
| H       | -1.017190                                    | -2.209424 | 1.588951  |              |
| H       | 0.608722                                     | -2.075536 | 1.591036  |              |
| H       | -0.048162                                    | 2.472716  | -0.851908 |              |
| H       | -0.625627                                    | 1.699618  | -2.187357 |              |

| Journal Name |   |           |                       | ARTICLE   |
|--------------|---|-----------|-----------------------|-----------|
| H            |   | 0.959205  | 1.618158              | -1.807862 |
| N            |   | -2.259876 | 0.336957              | 0.202518  |
| H            |   | -2.709899 | 0.736334              | -0.627550 |
| H            |   | -2.821593 | -0.478929             | 0.466444  |
| H            |   | -2.359537 | 1.029708              | 0.958318  |
| C            |   | -0.022778 | 1.284715              | 1.407571  |
| N            |   | -0.021046 | 2.091315              | 2.265912  |
| Compound     |   |           | <b>NO<sup>+</sup></b> |           |
| Atom         | X |           | Y                     | Z         |
| N            |   | 1.725484  | -0.050451             | -0.018854 |
| O            |   | 2.795915  | -0.082032             | -0.042689 |
| Compound     |   |           | <b>NO</b>             |           |
| Atom         | X |           | Y                     | Z         |
| N            |   | 1.678268  | -0.049059             | -0.017802 |
| O            |   | 2.837252  | -0.083251             | -0.043609 |

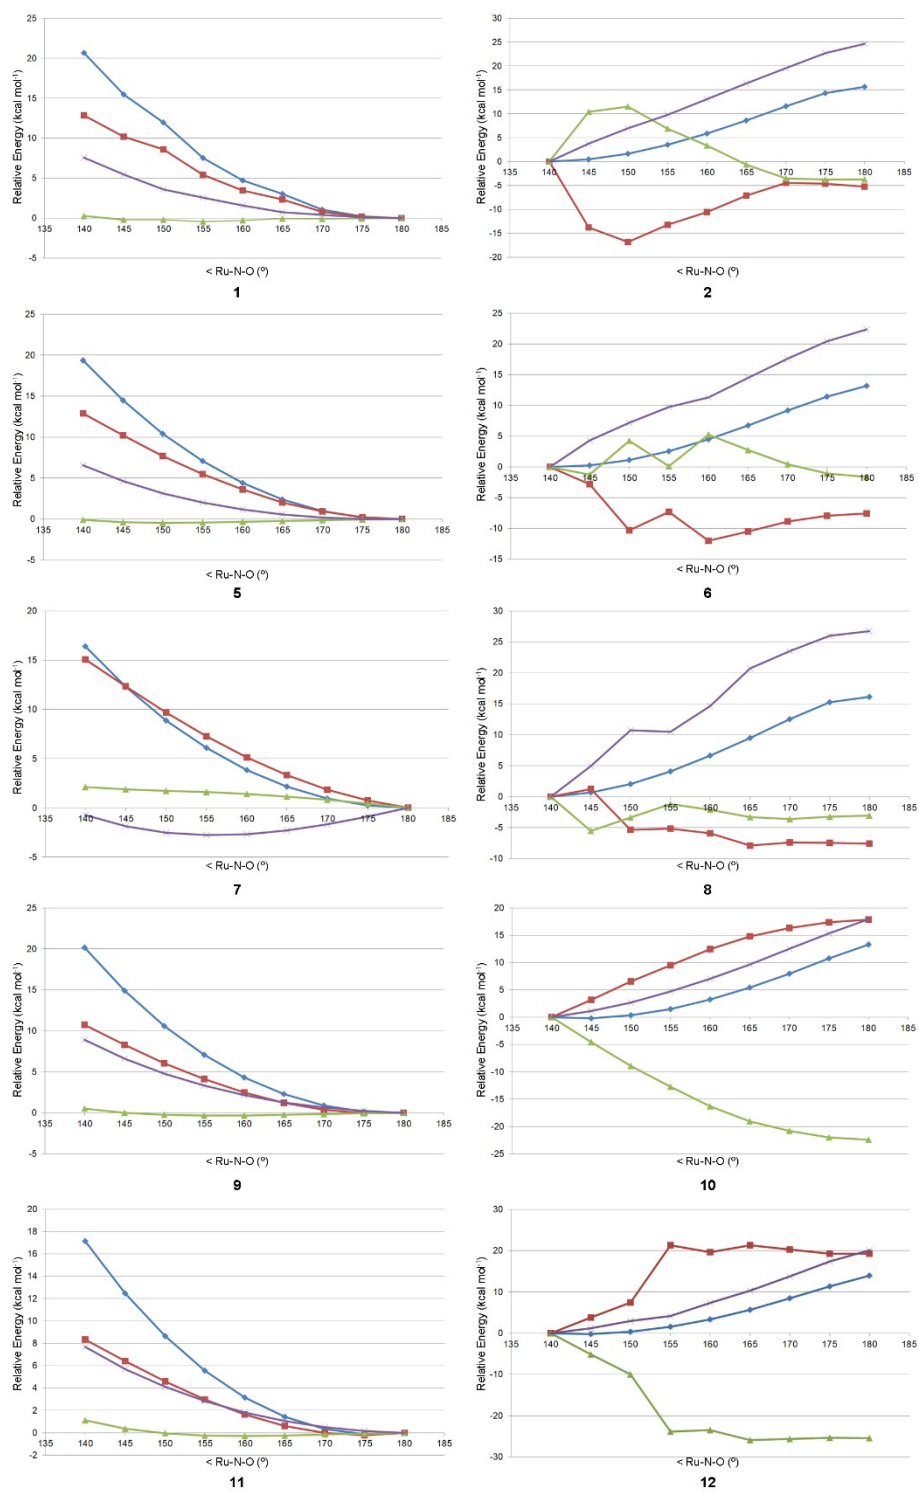

**Figure S1.** Relative values of the EDA components obtained by bending the Ru–N–O angles of **1**, **2** and **5–12**. Color code:  $\Delta\Delta E_{\text{int}}$  (blue),  $\Delta\Delta V_{\text{elstat}}$  (red),  $\Delta\Delta E_{\text{Pauli}}$  (green) and  $\Delta\Delta E_{\text{oi}}$  (purple).

**Table S2.** Relative values of the EDA components in the Ru–N–O angles (140–180°) of 1–8.

| 1   |                               |                                  |                                 |                              | 3   |                               |                                  |                                 |                              |
|-----|-------------------------------|----------------------------------|---------------------------------|------------------------------|-----|-------------------------------|----------------------------------|---------------------------------|------------------------------|
| <   | $\Delta\Delta E_{\text{int}}$ | $\Delta\Delta V_{\text{elstat}}$ | $\Delta\Delta E_{\text{Pauli}}$ | $\Delta\Delta E_{\text{oi}}$ | <   | $\Delta\Delta E_{\text{int}}$ | $\Delta\Delta V_{\text{elstat}}$ | $\Delta\Delta E_{\text{Pauli}}$ | $\Delta\Delta E_{\text{oi}}$ |
| 140 | 20.68                         | 12.85                            | 0.26                            | 7.57                         | 140 | 17.63                         | 6.20                             | 0.69                            | 10.74                        |
| 145 | 15.46                         | 10.19                            | -0.21                           | 5.48                         | 145 | 12.52                         | 4.54                             | -0.14                           | 8.12                         |
| 150 | 11.99                         | 8.60                             | -0.22                           | 3.61                         | 150 | 8.37                          | 3.04                             | -0.63                           | 5.97                         |
| 155 | 7.54                          | 5.43                             | -0.45                           | 2.56                         | 155 | 5.09                          | 1.69                             | -0.80                           | 4.21                         |
| 160 | 4.71                          | 3.44                             | -0.30                           | 1.58                         | 160 | 2.61                          | 0.61                             | -0.78                           | 2.80                         |
| 165 | 3.01                          | 2.32                             | -0.05                           | 0.75                         | 165 | 0.90                          | -0.08                            | -0.72                           | 1.71                         |
| 170 | 1.07                          | 0.80                             | -0.12                           | 0.39                         | 170 | -0.09                         | -0.49                            | -0.46                           | 0.87                         |
| 175 | 0.22                          | 0.17                             | -0.05                           | 0.10                         | 175 | -0.39                         | -0.47                            | -0.22                           | 0.31                         |
| 180 | 0.00                          | 0.00                             | 0.00                            | 0.00                         | 180 | 0.00                          | 0.00                             | 0.00                            | 0.00                         |
| 2   |                               |                                  |                                 |                              | 4   |                               |                                  |                                 |                              |
| <   | $\Delta\Delta E_{\text{int}}$ | $\Delta\Delta V_{\text{elstat}}$ | $\Delta\Delta E_{\text{Pauli}}$ | $\Delta\Delta E_{\text{oi}}$ | <   | $\Delta\Delta E_{\text{int}}$ | $\Delta\Delta V_{\text{elstat}}$ | $\Delta\Delta E_{\text{Pauli}}$ | $\Delta\Delta E_{\text{oi}}$ |
| 140 | 0.00                          | 0.00                             | 0.00                            | 0.00                         | 140 | 0.00                          | 0.00                             | 0.00                            | 0.00                         |
| 145 | 0.47                          | -13.73                           | 10.42                           | 3.78                         | 145 | 0.42                          | -13.15                           | 8.12                            | 5.45                         |
| 150 | 1.68                          | -16.82                           | 11.54                           | 6.96                         | 150 | 1.58                          | -7.00                            | 1.75                            | 6.83                         |
| 155 | 3.49                          | -13.24                           | 6.91                            | 9.81                         | 155 | 3.37                          | -7.56                            | 1.58                            | 9.35                         |
| 160 | 5.84                          | -10.55                           | 3.34                            | 13.05                        | 160 | 5.61                          | -18.81                           | 8.23                            | 16.19                        |
| 165 | 8.60                          | -7.14                            | -0.59                           | 16.33                        | 165 | 8.12                          | -17.22                           | 5.26                            | 20.08                        |
| 170 | 11.56                         | -4.49                            | -3.49                           | 19.54                        | 170 | 10.70                         | -14.73                           | 2.92                            | 22.51                        |
| 175 | 14.35                         | -4.64                            | -3.73                           | 22.72                        | 175 | 12.86                         | -15.25                           | 2.13                            | 25.98                        |
| 180 | 15.63                         | -5.26                            | -3.73                           | 24.62                        | 180 | 13.59                         | -13.80                           | 1.73                            | 25.66                        |
| 5   |                               |                                  |                                 |                              | 7   |                               |                                  |                                 |                              |
| <   | $\Delta\Delta E_{\text{int}}$ | $\Delta\Delta V_{\text{elstat}}$ | $\Delta\Delta E_{\text{Pauli}}$ | $\Delta\Delta E_{\text{oi}}$ | <   | $\Delta\Delta E_{\text{int}}$ | $\Delta\Delta V_{\text{elstat}}$ | $\Delta\Delta E_{\text{Pauli}}$ | $\Delta\Delta E_{\text{oi}}$ |
| 140 | 19.37                         | 12.90                            | -0.08                           | 6.55                         | 140 | 16.39                         | 15.05                            | 2.08                            | -0.74                        |
| 145 | 14.50                         | 10.21                            | -0.36                           | 4.65                         | 145 | 12.29                         | 12.33                            | 1.85                            | -1.89                        |
| 150 | 10.41                         | 7.71                             | -0.45                           | 3.15                         | 150 | 8.87                          | 9.69                             | 1.72                            | -2.55                        |
| 155 | 7.07                          | 5.49                             | -0.43                           | 2.00                         | 155 | 6.07                          | 7.27                             | 1.59                            | -2.79                        |
| 160 | 4.40                          | 3.59                             | -0.34                           | 1.16                         | 160 | 3.82                          | 5.11                             | 1.40                            | -2.69                        |
| 165 | 2.38                          | 2.04                             | -0.23                           | 0.56                         | 165 | 2.12                          | 3.30                             | 1.12                            | -2.31                        |
| 170 | 0.99                          | 0.92                             | -0.12                           | 0.19                         | 170 | 0.91                          | 1.82                             | 0.79                            | -1.70                        |
| 175 | 0.20                          | 0.24                             | -0.05                           | 0.01                         | 175 | 0.21                          | 0.72                             | 0.41                            | -0.92                        |
| 180 | 0.00                          | 0.00                             | 0.00                            | 0.00                         | 180 | 0.00                          | 0.00                             | 0.00                            | 0.00                         |
| 6   |                               |                                  |                                 |                              | 8   |                               |                                  |                                 |                              |
| <   | $\Delta\Delta E_{\text{int}}$ | $\Delta\Delta V_{\text{elstat}}$ | $\Delta\Delta E_{\text{Pauli}}$ | $\Delta\Delta E_{\text{oi}}$ | <   | $\Delta\Delta E_{\text{int}}$ | $\Delta\Delta V_{\text{elstat}}$ | $\Delta\Delta E_{\text{Pauli}}$ | $\Delta\Delta E_{\text{oi}}$ |
| 140 | 0.00                          | 0.00                             | 0.00                            | 0.00                         | 140 | 0.00                          | 0.00                             | 0.00                            | 0.00                         |
| 145 | 0.21                          | -2.83                            | -1.24                           | 4.27                         | 145 | 0.65                          | 1.22                             | -5.55                           | 4.97                         |
| 150 | 1.10                          | -10.36                           | 4.26                            | 7.19                         | 150 | 2.06                          | -5.32                            | -3.35                           | 10.72                        |
| 155 | 2.54                          | -7.33                            | 0.13                            | 9.73                         | 155 | 4.09                          | -5.16                            | -1.22                           | 10.46                        |
| 160 | 4.46                          | -12.04                           | 5.20                            | 11.29                        | 160 | 6.62                          | -5.93                            | -2.14                           | 14.67                        |
| 165 | 6.72                          | -10.52                           | 2.72                            | 14.50                        | 165 | 9.50                          | -7.92                            | -3.33                           | 20.74                        |
| 170 | 9.14                          | -8.90                            | 0.42                            | 17.61                        | 170 | 12.54                         | -7.38                            | -3.64                           | 23.54                        |
| 175 | 11.43                         | -7.93                            | -1.08                           | 20.43                        | 175 | 15.29                         | -7.47                            | -3.27                           | 26.02                        |
| 180 | 13.16                         | -7.55                            | -1.67                           | 22.37                        | 180 | 16.12                         | -7.59                            | -3.03                           | 26.72                        |

**Table S3.** Relative values of the EDA components in the Ru–N–O angles (140–180°) of **9–12**.

| <b>9</b>  |                               |                                  |                                 |                              | <b>11</b> |                               |                                  |                                 |                              |
|-----------|-------------------------------|----------------------------------|---------------------------------|------------------------------|-----------|-------------------------------|----------------------------------|---------------------------------|------------------------------|
| <         | $\Delta\Delta E_{\text{int}}$ | $\Delta\Delta V_{\text{elstat}}$ | $\Delta\Delta E_{\text{Pauli}}$ | $\Delta\Delta E_{\text{oi}}$ | <         | $\Delta\Delta E_{\text{int}}$ | $\Delta\Delta V_{\text{elstat}}$ | $\Delta\Delta E_{\text{Pauli}}$ | $\Delta\Delta E_{\text{oi}}$ |
| 140       | 20.13                         | 10.72                            | 0.52                            | 8.90                         | 140       | 17.13                         | 8.34                             | 1.12                            | 7.67                         |
| 145       | 14.92                         | 8.29                             | 0.01                            | 6.63                         | 145       | 12.47                         | 6.40                             | 0.37                            | 5.70                         |
| 150       | 10.60                         | 6.07                             | -0.24                           | 4.78                         | 150       | 8.63                          | 4.58                             | -0.05                           | 4.10                         |
| 155       | 7.08                          | 4.12                             | -0.34                           | 3.31                         | 155       | 5.55                          | 2.98                             | -0.26                           | 2.83                         |
| 160       | 4.33                          | 2.49                             | -0.31                           | 2.16                         | 160       | 3.15                          | 1.62                             | -0.29                           | 1.82                         |
| 165       | 2.28                          | 1.23                             | -0.23                           | 1.29                         | 165       | 1.43                          | 0.62                             | -0.25                           | 1.06                         |
| 170       | 0.89                          | 0.39                             | -0.14                           | 0.66                         | 170       | 0.33                          | -0.01                            | -0.17                           | 0.51                         |
| 175       | 0.13                          | -0.04                            | -0.06                           | 0.23                         | 175       | -0.13                         | -0.22                            | -0.08                           | 0.16                         |
| 180       | 0.00                          | 0.00                             | 0.00                            | 0.00                         | 180       | 0.00                          | 0.00                             | 0.00                            | 0.00                         |
| <b>10</b> |                               |                                  |                                 |                              | <b>12</b> |                               |                                  |                                 |                              |
| <         | $\Delta\Delta E_{\text{int}}$ | $\Delta\Delta V_{\text{elstat}}$ | $\Delta\Delta E_{\text{Pauli}}$ | $\Delta\Delta E_{\text{oi}}$ | <         | $\Delta\Delta E_{\text{int}}$ | $\Delta\Delta V_{\text{elstat}}$ | $\Delta\Delta E_{\text{Pauli}}$ | $\Delta\Delta E_{\text{oi}}$ |
| 140       | 0.00                          | 0.00                             | 0.00                            | 0.00                         | 140       | 0.00                          | 0.00                             | 0.00                            | 0.00                         |
| 145       | -0.20                         | 3.20                             | -4.53                           | 1.14                         | 145       | -0.22                         | 3.75                             | -5.19                           | 1.23                         |
| 150       | 0.34                          | 6.53                             | -8.89                           | 2.71                         | 150       | 0.33                          | 7.44                             | -10.03                          | 2.92                         |
| 155       | 1.50                          | 9.49                             | -12.70                          | 4.71                         | 155       | 1.55                          | 21.29                            | -23.86                          | 4.12                         |
| 160       | 3.22                          | 12.47                            | -16.28                          | 7.03                         | 160       | 3.36                          | 19.58                            | -23.51                          | 7.29                         |
| 165       | 5.41                          | 14.80                            | -19.04                          | 9.66                         | 165       | 5.70                          | 21.29                            | -25.90                          | 10.32                        |
| 170       | 7.98                          | 16.28                            | -20.80                          | 12.51                        | 170       | 8.42                          | 20.24                            | -25.60                          | 13.78                        |
| 175       | 10.73                         | 17.40                            | -22.03                          | 15.36                        | 175       | 11.33                         | 19.29                            | -25.35                          | 17.39                        |
| 180       | 13.30                         | 17.84                            | -22.42                          | 17.90                        | 180       | 13.90                         | 19.23                            | -25.44                          | 20.10                        |

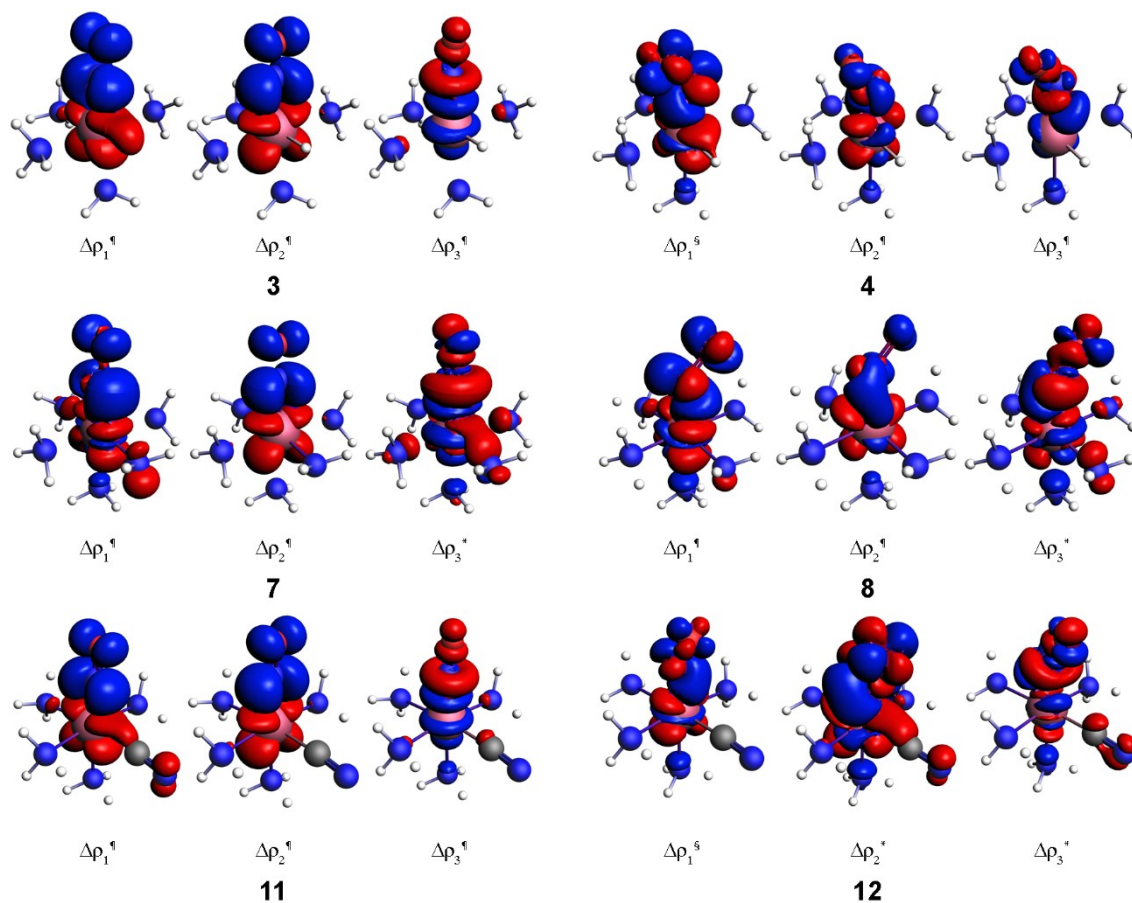

**Figure S2.** Selected density deformation channels,  $\Delta\rho_{1-3}$ , for the interacting fragments: i)  $[\text{RuL}_{\text{cis}}(\text{NH}_3)_4]^{2+} - \text{NO}^+$  (**3**, **7** and **11**); and ii)  $[\text{RuL}_{\text{cis}}(\text{NH}_3)_4]^+ - \text{NO}^0$  (**4**, **8** and **12**). Red and blue regions indicate the electronic density outflow and inflow, respectively. Chosen contour values:  $^*$ =0.001;  $^\dagger$ =0.003;  $^\ddagger$ =0.005 a.u.

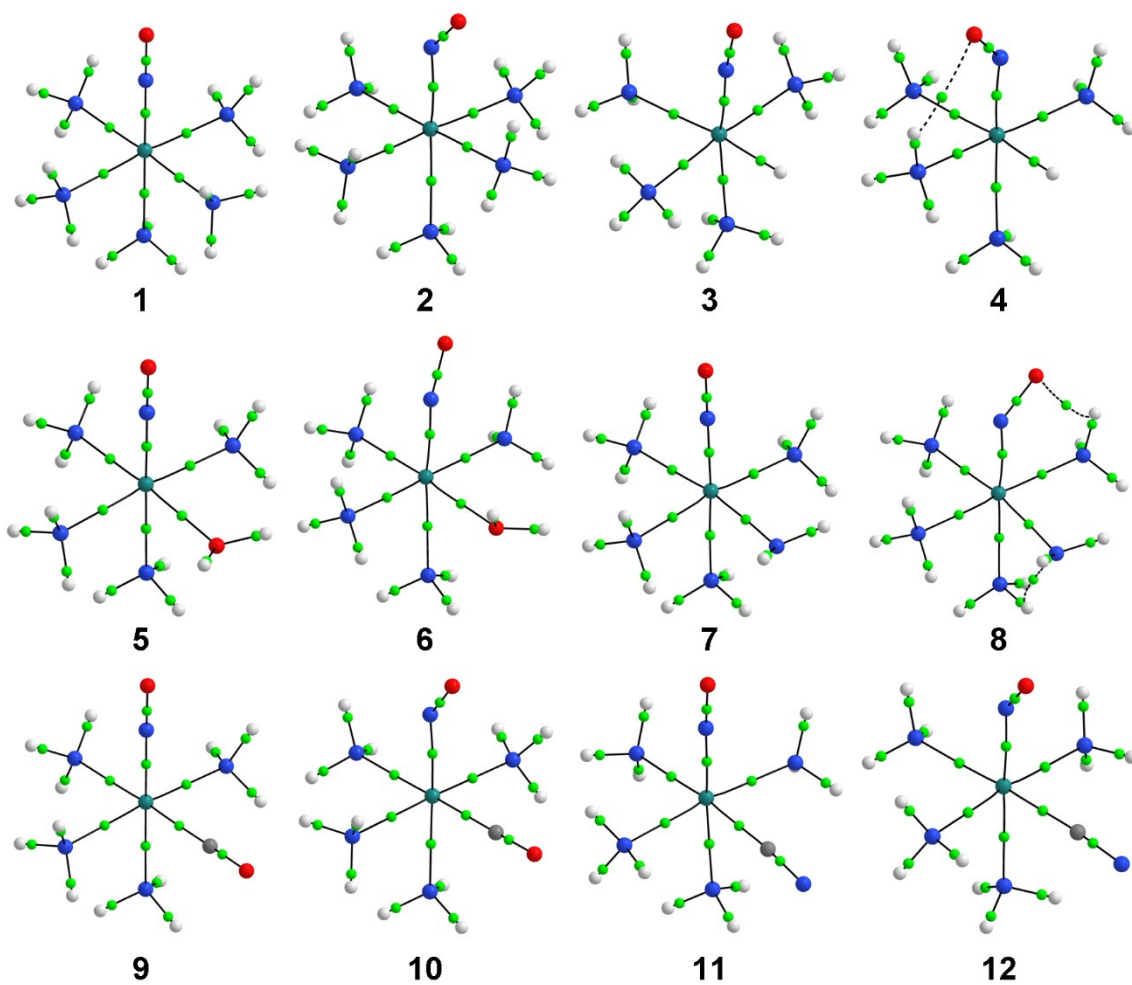

**Figure S3.** Topological map containing the bond paths (continuous or dashed lines connecting the cores) and bond critical points (small green points) for the structures studied in this paper. Atoms color code: H (white), C (gray), N (blue), O (red) and Ru (turquoise).



**Table S4.** Total energy density,  $H_b$ , and electron density,  $\rho_b$ , in the Ru–NO BCP of the compounds investigated. The values of all the parameters are in a.u.

| Complex                 | $H_b$  | $\rho_b$ |
|-------------------------|--------|----------|
| <b>1</b>                | −0.088 | 0.184    |
| <b>2</b>                | −0.081 | 0.174    |
| <b>3</b>                | −0.107 | 0.199    |
| <b>4</b> <sup>[a]</sup> | −0.092 | 0.185    |
| <b>5</b>                | −0.084 | 0.180    |
| <b>6</b>                | −0.083 | 0.176    |
| <b>7</b>                | −0.106 | 0.199    |
| <b>8</b> <sup>[b]</sup> | −0.096 | 0.188    |
| <b>9</b>                | −0.074 | 0.170    |
| <b>10</b>               | −0.061 | 0.153    |
| <b>11</b>               | −0.097 | 0.191    |
| <b>12</b>               | −0.082 | 0.175    |

<sup>[a]</sup> To compound **4**, there is one BCP related to N–H $\cdots$ O–N interaction with values of  $H_b$  and  $\rho_b$  equal to 0.003 and 0.015 a.u., respectively. <sup>[b]</sup> To compound **8**, there is one BCP related to N–H $\cdots$ O–N interaction with values of  $H_b$  and  $\rho_b$  equal to 0.003 and 0.016 a.u., respectively.
