# Supplementary figures and images for: Can the relative positions (cis–trans) of ligands really modulate the coordination of NO in ruthenium nitrosyl complexes?
Source: Royal Society of Chemistry journal article supplement (doi:10.1039/d0nj05262k), 2020-12-21

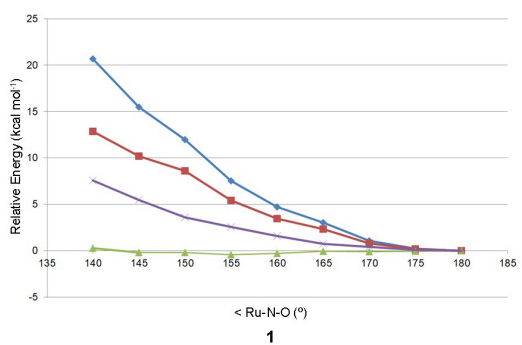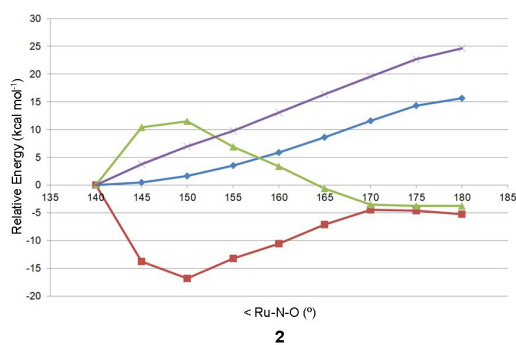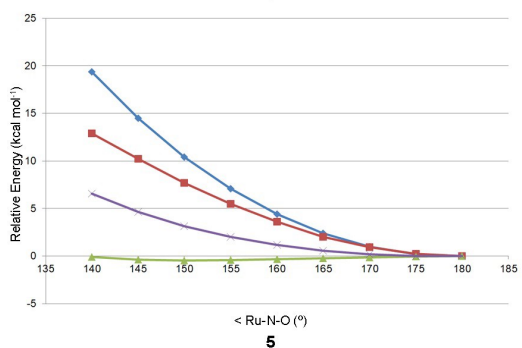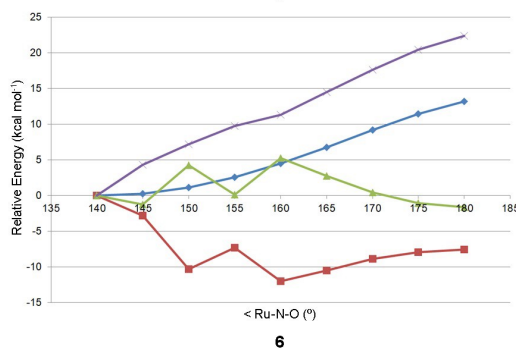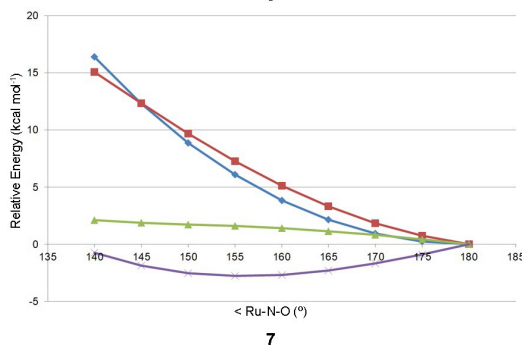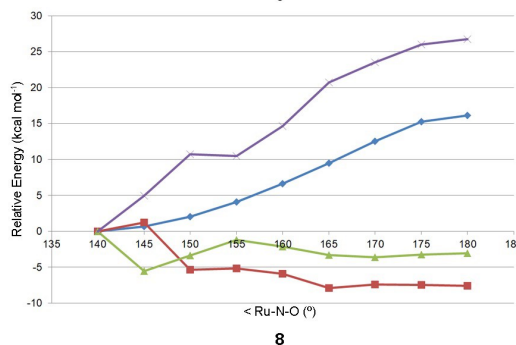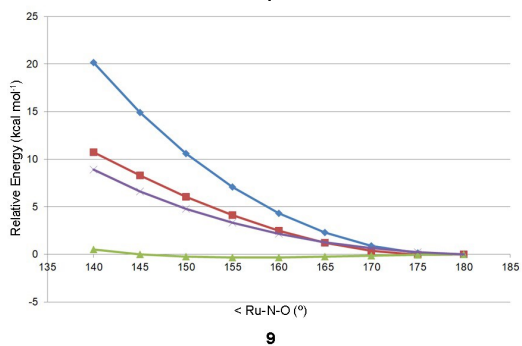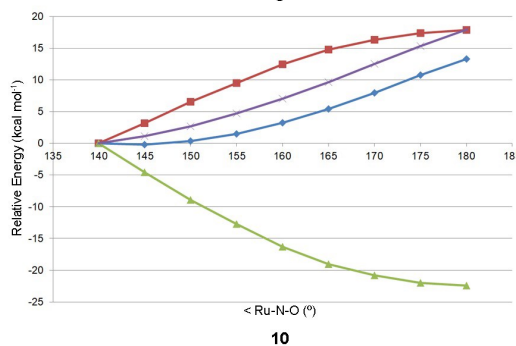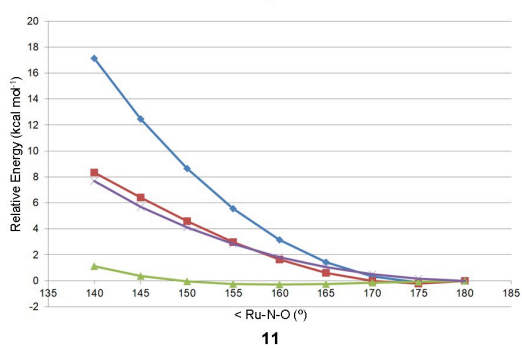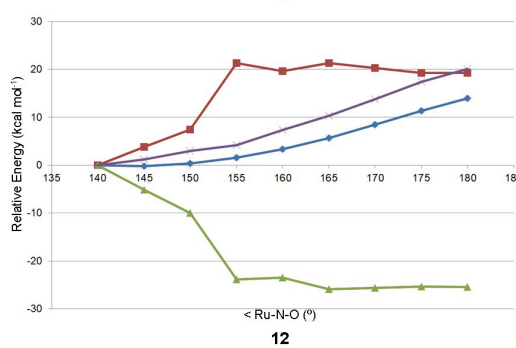

Supplement: d0nj05262k3.pdf [file d0nj05262k3.pdf]

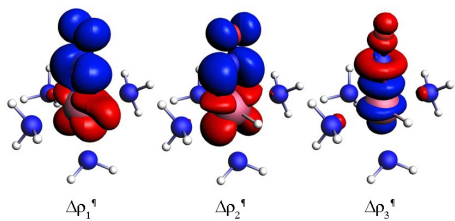

**3**

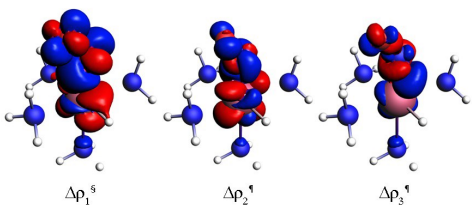

**4**

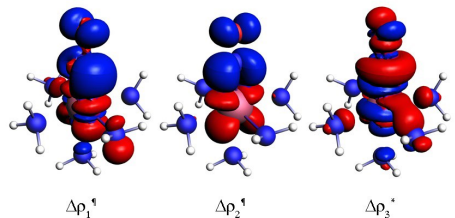

**7**

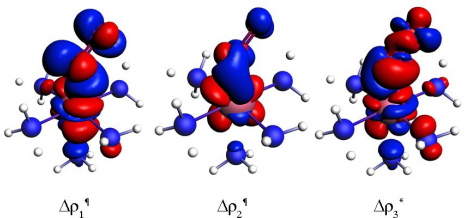

**8**

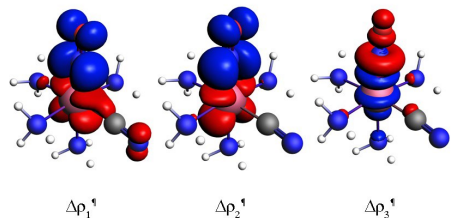

**11**

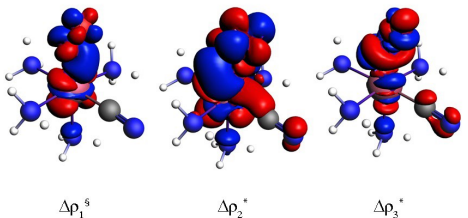

**12**

Supplement: d0nj05262k4.pdf [file d0nj05262k4.pdf]

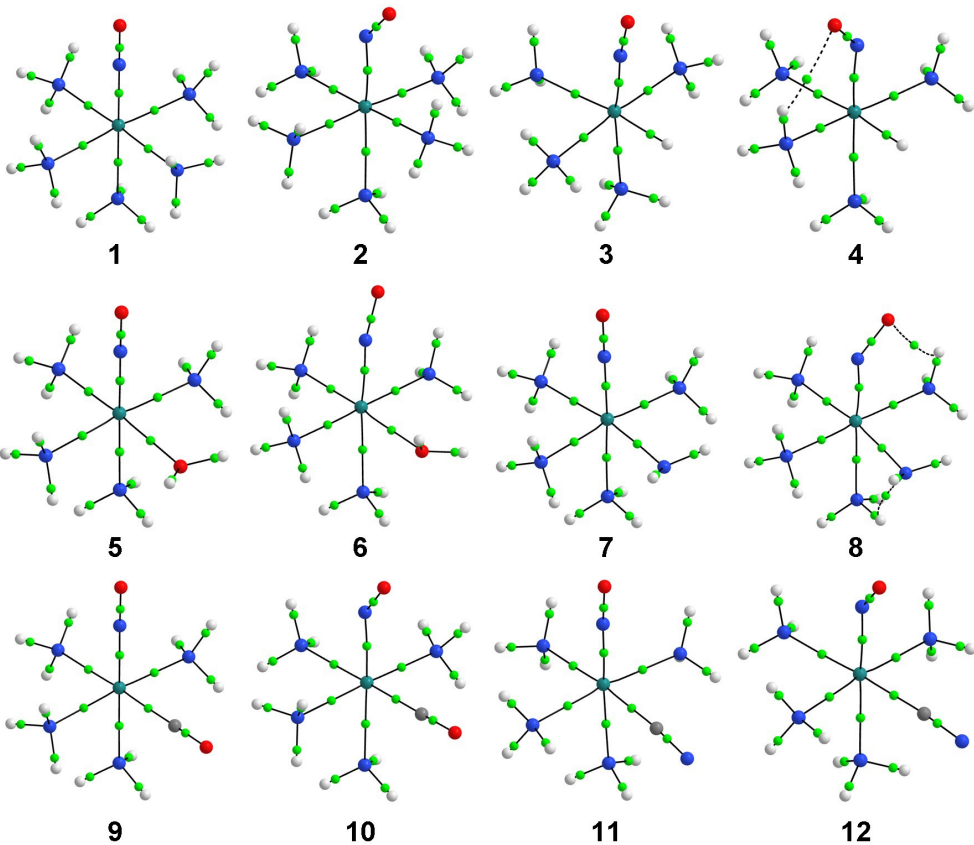

Supplement: d0nj05262k5.pdf [file d0nj05262k5.pdf]
